# Supplementary material
Source: PubMed Central journal article supplement (PMC10297746)
Supplement: NIHMS1886826-supplement-1.pdf [file NIHMS1886826-supplement-1.pdf]

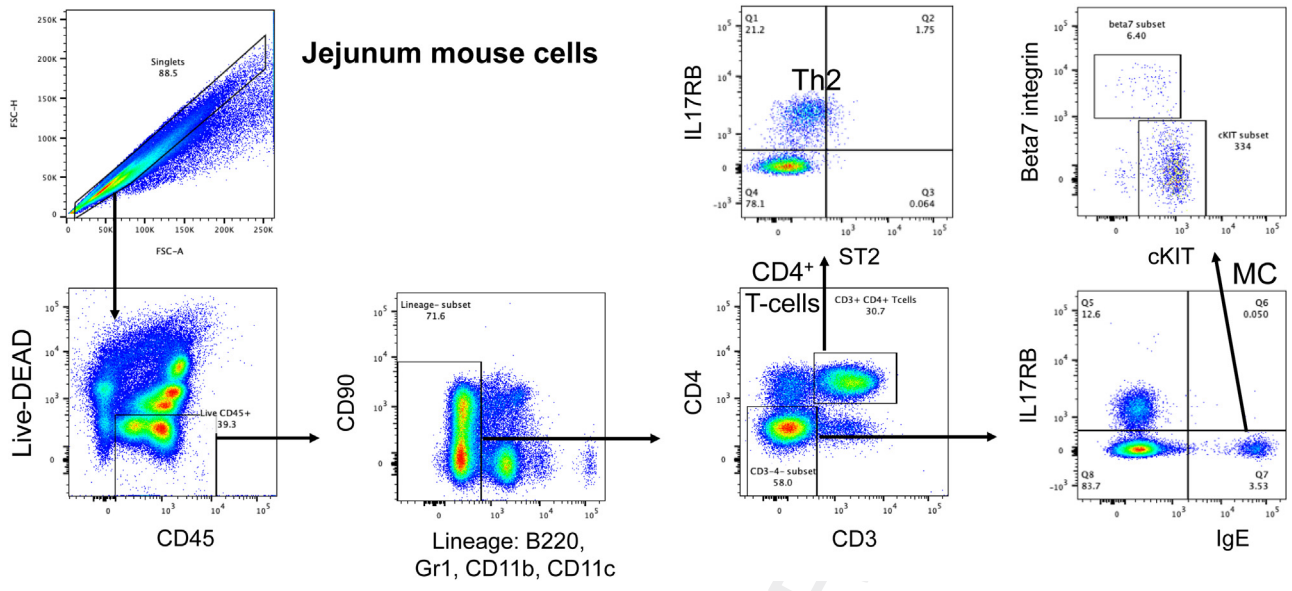

**FIG E1.** Gating strategy for flow cytometry analysis of intestinal mast cells. After lamina propria cells were isolated from small intestine of OVA challenged mice,  $5 \times 10^5$  to  $10^6$  cells were stained with the panel of antibodies listed in Table E1, acquired on a BD Fortessa device, and analyzed by FlowJo software to identify mast cells as live, CD45<sup>+</sup>, lineage negative, IgE high, and cKit<sup>+</sup>.

UNCORRECTED

1136  
1137  
1138  
1139  
1140  
1141  
1142  
1143  
1144  
1145  
1146  
1147  
1148  
1149  
1150  
1151  
1152  
1153  
1154  
1155  
1156  
1157  
1158  
1159  
1160  
1161  
1162  
1163  
1164  
1165  
1166  
1167  
1168  
1169  
1170  
1171  
1172  
1173  
1174  
1175  
1176  
1177  
1178  
1179  
1180  
1181  
1182  
1183  
1184  
1185  
1186  
1187  
1188  
1189  
1190  
1191  
1192  
1193  
1194  
1195

**TABLE E1.** Antibodies used for flow cytometry

| Antibody                                    | Clone      | Vendor                                | Catalog    |
|---------------------------------------------|------------|---------------------------------------|------------|
| FITC anti-mouse CD45R/B220                  | RA3-6B2    | BioLegend                             | 103206     |
| FITC anti-mouse/human CD11b                 | M1/70      | BioLegend                             | 101206     |
| FITC anti-mouse CD11c                       | N418       | BioLegend                             | 117306     |
| FITC anti-mouse Ly-6G/Ly-6C(Gr-1)           | RB6-8C5    | BioLegend                             | 108406     |
| PE anti-mouse IgE                           | RME-1      | BioLegend                             | 406908     |
| PE-Cy7 anti-mouse CD107a (LAMP1)            | 1D4B       | BioLegend                             | 121619     |
| PerCP/Cy5.5 anti-mouse CD8b                 | YTS156.7.7 | eBioscience; Thermo Fisher Scientific | 46-7133-82 |
| Alexa Fluor 647 anti-mouse IL17RB           | 9B10       | BioLegend                             | 146304     |
| Alexa Fluor 700 anti-mouse CD45.2           | 104        | BioLegend                             | 109822     |
| APC/Fire 750 anti-mouse CD117 (c-kit)       | 2B8        | BioLegend                             | 105838     |
| Rat anti-mouse T1/ST2—biotinylated          | DJ8        | MD Bioproducts, St Paul, Minn         | 101001B    |
| BD Horizon Bv421 streptavidin               | —          | BD Biosciences                        | 563259     |
| BD Horizon V500 anti-mouse CD4              | RM4-5      | BD Biosciences                        | 560782     |
| BD OptiBuild BUV737 anti-mouse CD3          | 17A2       | BD Biosciences                        | 741788     |
| Brilliant violet 711 anti-mouse integrin b7 | FIB504     | BioLegend                             | 321239     |
| Brilliant violet 785 anti-mouse CD90.2      | 30-H12     | BioLegend                             | 105331     |

*FITC*, Fluorescein isothiocyanate; *PE*, phycoerythrin.

Q5

1256  
1257  
1258  
1259  
1260  
1261  
1262  
1263  
1264  
1265  
1266  
1267  
1268  
1269  
1270  
1271  
1272  
1273  
1274  
1275  
1276  
1277  
1278  
1279  
1280  
1281  
1282  
1283  
1284  
1285  
1286  
1287  
1288  
1289  
1290  
1291  
1292  
1293  
1294  
1295  
1296  
1297  
1298  
1299  
1300  
1301  
1302  
1303  
1304  
1305  
1306  
1307  
1308  
1309  
1310  
1311  
1312  
1313  
1314  
1315
